# Supplementary material for: Simultaneous Inhibition of PI3Kand PAK in Preclinical Models of Neurofibromatosis Type 2-related Schwannomatosis
Source: Research Square preprint supplement (doi:10.21203/rs.3.rs-3405297/v1), 2023-10-16
Supplement: Supplementary file [file e4f5f1168bc30b088855bf6b.pdf]

## Supplementary Tables

**Supplementary Table 1.** Targeted drug screen candidates for PI3K/Akt combination treatments and respective inhibited pathways.

| Inhibitor  | Target                                        | Inhibitor                | Target                            |
|------------|-----------------------------------------------|--------------------------|-----------------------------------|
| Omipalisib | PI3K $\alpha$ / $\beta$ / $\delta$ / $\gamma$ | Mebendazole              | Tubulin depolymerization          |
|            |                                               | Ibrutinib                | Brutons tyrosine kinase BTK & ITK |
|            |                                               | Crizotinib               | Multi-tyrosine kinase, c-MET      |
|            |                                               | PF-3758309               | PAK4                              |
|            |                                               | KPT-9274                 | PAK4 and NAMPT                    |
|            |                                               | (-)- $\beta$ -Hydrastine | PAK4                              |
| Pictilisib | PI3K $\alpha$ / $\delta$                      | PF-3758309               | PAK4                              |
| Buparlisib | PI3K $\alpha$ / $\beta$ / $\delta$ / $\gamma$ | Danuserib                | Aurora-A/B/C Kinase               |
|            |                                               | Nintedamib               | WGFR-1/2/3                        |
|            |                                               | Crizotinib               | Multi-tyrosine kinase, c-MET      |
|            |                                               | PF-3758309               | PAK4                              |
|            |                                               | KPT-9274                 | PAK4 and NAMPT                    |
|            |                                               | (-)- $\beta$ -Hydrastine | PAK4                              |

**Supplementary Table 2.** EC50 drug concentrations for human (HS01, HS02/HS03) and mouse (MS01) MD-SC lines when drugs are delivered as monotherapies.

| Inhibitor                | EC50 HS01    | EC50 HS02/HS03 | EC50 MS01 |
|--------------------------|--------------|----------------|-----------|
| Omipalisib               | 2.02 nM      | 26.8 nM        | 7.01 nM   |
| Pictilisib               | > 10 $\mu$ M | > 10 $\mu$ M   | 1462 nM   |
| Buparlisib               | 1905 nM      | 2098 nM        | 870 nM    |
| Mebendazole              | 2068 nM      | 774 nM         | 195 nM    |
| Ibrutinib                | 7812 nM      | 11.7 $\mu$ M   | 7045 nM   |
| Crizotinib               | 1536 nM      | 621 nM         |           |
| PF-3758309               | 2009 nM      | 1765 nM        | 207 nM    |
| KPT-9274                 | > 10 $\mu$ M | 691 nM         |           |
| (-)- $\beta$ -Hydrastine | > 10 $\mu$ M | 384 nM         |           |
| Danuserib                | 1527 nM      | 15.6 $\mu$ M   | 9071 nM   |
| Nintedamib               | 5352 nM      | > 10 $\mu$ M   | 3121 nM   |

**Supplementary Table 3.** Loewe synergy scores (sum\_syn\_ant) for drug combinations in human MD-SC lines (HS01, HS03) and mouse MD-SC lines (MS01). Drugs were tested in 10x10 combination matrices.

| Inhibitor         | Inhibitor                | Loewe Synergy Score (HS01) | Loewe Synergy Score (HS03) | Loewe Synergy Score (MS01) |
|-------------------|--------------------------|----------------------------|----------------------------|----------------------------|
| <b>Omipalisib</b> | Mebendazole              | 16.49                      | 3.25                       | 2.53                       |
|                   | Ibrutinib                | 12.65                      | 1.02                       | 3.27                       |
|                   | Crizotinib               | 12.12                      | 7.02                       |                            |
|                   | PF-3758309               | 73.55                      | 12.12                      |                            |
|                   | KPT-9274                 | 1.00                       | 6.89                       |                            |
|                   | (-)- $\beta$ -Hydrastine | 8.42                       | 43.60                      |                            |
| <b>Pictilisib</b> | PF-3758309               | 79.75                      | 58.85                      | 93.12                      |
| <b>Buparlisib</b> | Danusertib               | 28.4                       | 12.06                      | 1.99                       |
|                   | Nintedanib               | 4.27                       | 43.69                      | 7.76                       |
|                   | Crizotinib               | 9.44                       | 4.79                       |                            |
|                   | PF-3758309               | 36.66                      | 9.44                       |                            |
|                   | KPT-9274                 | 33.47                      | 28.06                      |                            |
|                   | (-)- $\beta$ -Hydrastine | 1.46                       | 9.44                       |                            |

## Supplementary Figures

### Supplementary Figure S1

#### Pictilisib vs. PF-3758309

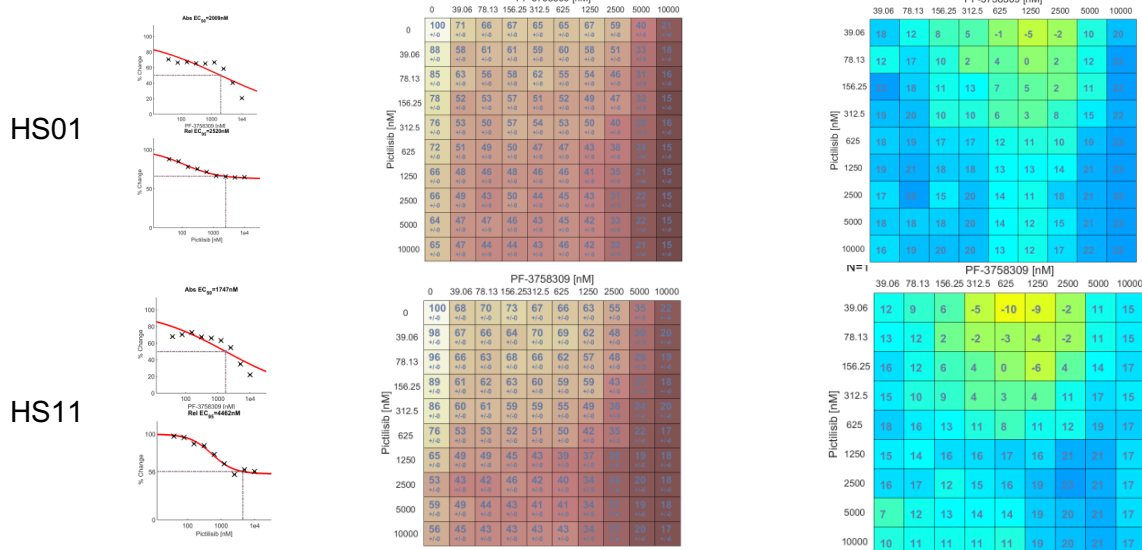

HS04.3

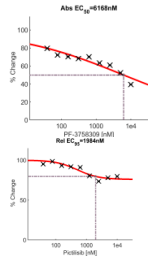

|                 |        | PF-3758309 [nM] |       |       |        |       |     |      |      |      |       |    |    |
|-----------------|--------|-----------------|-------|-------|--------|-------|-----|------|------|------|-------|----|----|
|                 |        | 0               | 39.06 | 78.13 | 156.25 | 312.5 | 625 | 1250 | 2500 | 5000 | 10000 |    |    |
| Pictilisib [nM] | 0      | 100             | 80    | 72    | 70     | 68    | 71  | 63   | 61   | 51   | 52    | 37 | 19 |
|                 | 39.06  | 95              | 75    | 71    | 73     | 73    | 71  | 68   | 64   | 54   | 47    | 37 | 20 |
|                 | 78.13  | 98              | 80    | 73    | 72     | 69    | 69  | 61   | 61   | 49   | 39    | 30 | 20 |
|                 | 156.25 | 93              | 78    | 71    | 71     | 67    | 62  | 64   | 59   | 45   | 35    | 26 | 16 |
|                 | 312.5  | 92              | 72    | 67    | 64     | 67    | 63  | 59   | 59   | 44   | 34    | 25 | 16 |
|                 | 625    | 91              | 68    | 66    | 62     | 64    | 62  | 59   | 53   | 43   | 38    | 28 | 18 |
|                 | 1250   | 80              | 63    | 61    | 62     | 61    | 58  | 58   | 52   | 47   | 41    | 31 | 21 |
|                 | 2500   | 73              | 60    | 60    | 60     | 58    | 59  | 57   | 50   | 44   | 38    | 28 | 18 |
|                 | 5000   | 78              | 64    | 61    | 57     | 59    | 57  | 54   | 50   | 42   | 42    | 32 | 22 |
|                 | 10000  | 80              | 63    | 63    | 58     | 59    | 60  | 58   | 54   | 43   | 41    | 31 | 21 |

HS03

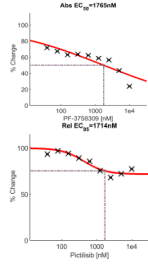

|                 |        | PF-3758309 [nM] |       |       |        |       |     |      |      |      |       |    |    |
|-----------------|--------|-----------------|-------|-------|--------|-------|-----|------|------|------|-------|----|----|
|                 |        | 0               | 39.06 | 78.13 | 156.25 | 312.5 | 625 | 1250 | 2500 | 5000 | 10000 |    |    |
| Pictilisib [nM] | 0      | 100             | 72    | 67    | 63     | 64    | 62  | 59   | 56   | 44   | 36    | 26 | 16 |
|                 | 39.06  | 93              | 67    | 62    | 62     | 62    | 58  | 62   | 54   | 41   | 35    | 25 | 15 |
|                 | 78.13  | 97              | 66    | 61    | 60     | 58    | 57  | 55   | 51   | 39   | 35    | 25 | 15 |
|                 | 156.25 | 94              | 62    | 59    | 58     | 56    | 55  | 52   | 46   | 36   | 28    | 18 | 8  |
|                 | 312.5  | 89              | 59    | 55    | 53     | 54    | 52  | 50   | 45   | 34   | 25    | 17 | 7  |
|                 | 625    | 86              | 55    | 52    | 52     | 51    | 51  | 48   | 42   | 32   | 24    | 16 | 6  |
|                 | 1250   | 76              | 52    | 50    | 49     | 48    | 48  | 44   | 42   | 31   | 23    | 15 | 5  |
|                 | 2500   | 68              | 48    | 45    | 48     | 44    | 44  | 43   | 37   | 27   | 19    | 12 | 5  |
|                 | 5000   | 72              | 51    | 48    | 48     | 48    | 47  | 45   | 38   | 30   | 21    | 13 | 5  |
|                 | 10000  | 77              | 50    | 47    | 47     | 48    | 48  | 45   | 41   | 31   | 24    | 15 | 5  |

HS12

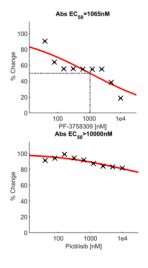

|                 |        | PF-3758309 [nM] |       |       |        |       |     |      |      |      |       |    |   |
|-----------------|--------|-----------------|-------|-------|--------|-------|-----|------|------|------|-------|----|---|
|                 |        | 0               | 39.06 | 78.13 | 156.25 | 312.5 | 625 | 1250 | 2500 | 5000 | 10000 |    |   |
| Pictilisib [nM] | 0      | 100             | 90    | 64    | 56     | 56    | 55  | 55   | 55   | 39   | 19    | 10 | 5 |
|                 | 39.06  | 91              | 62    | 57    | 59     | 56    | 56  | 52   | 53   | 35   | 18    | 8  | 4 |
|                 | 78.13  | 94              | 59    | 57    | 55     | 53    | 51  | 50   | 50   | 31   | 16    | 7  | 4 |
|                 | 156.25 | 99              | 57    | 54    | 48     | 45    | 51  | 50   | 45   | 25   | 11    | 5  | 3 |
|                 | 312.5  | 94              | 57    | 59    | 49     | 42    | 43  | 36   | 36   | 16   | 16    | 8  | 4 |
|                 | 625    | 92              | 57    | 57    | 49     | 44    | 49  | 41   | 37   | 28   | 17    | 10 | 5 |
|                 | 1250   | 88              | 55    | 51    | 49     | 45    | 42  | 40   | 37   | 27   | 17    | 10 | 5 |
|                 | 2500   | 84              | 53    | 51    | 55     | 55    | 43  | 44   | 35   | 25   | 18    | 10 | 5 |
|                 | 5000   | 83              | 51    | 41    | 46     | 40    | 39  | 38   | 36   | 25   | 18    | 10 | 5 |
|                 | 10000  | 82              | 49    | 47    | 48     | 46    | 45  | 37   | 33   | 21   | 19    | 10 | 5 |

MS01

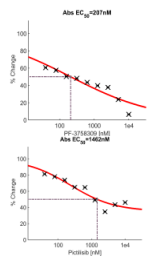

|                 |        | PF-3758309 [nM] |       |       |        |       |     |      |      |      |       |   |   |
|-----------------|--------|-----------------|-------|-------|--------|-------|-----|------|------|------|-------|---|---|
|                 |        | 0               | 39.06 | 78.13 | 156.25 | 312.5 | 625 | 1250 | 2500 | 5000 | 10000 |   |   |
| Pictilisib [nM] | 0      | 100             | 61    | 57    | 50     | 48    | 43  | 46   | 38   | 28   | 7     | 5 | 4 |
|                 | 39.06  | 91              | 48    | 49    | 44     | 44    | 44  | 41   | 31   | 19   | 6     | 4 | 3 |
|                 | 78.13  | 78              | 42    | 38    | 40     | 36    | 34  | 31   | 21   | 14   | 6     | 4 | 3 |
|                 | 156.25 | 74              | 38    | 35    | 35     | 30    | 28  | 28   | 12   | 5    | 3     | 2 | 1 |
|                 | 312.5  | 85              | 35    | 31    | 31     | 25    | 22  | 20   | 9    | 5    | 3     | 2 | 1 |
|                 | 625    | 85              | 35    | 31    | 31     | 22    | 20  | 16   | 7    | 5    | 3     | 2 | 1 |
|                 | 1250   | 69              | 30    | 28    | 22     | 20    | 18  | 12   | 6    | 5    | 3     | 2 | 1 |
|                 | 2500   | 63              | 25    | 23    | 19     | 20    | 19  | 15   | 10   | 6    | 6     | 4 | 3 |
|                 | 5000   | 63              | 25    | 21    | 21     | 21    | 18  | 13   | 7    | 6    | 4     | 3 | 2 |
|                 | 10000  | 63              | 23    | 20    | 20     | 21    | 21  | 18   | 13   | 6    | 5     | 4 | 3 |

### Buparlisib vs. Danusertib

HS01

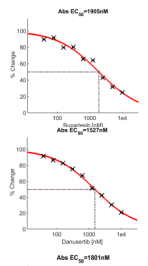

|                 |        | Danusertib [nM] |       |       |        |       |     |      |      |      |       |    |   |
|-----------------|--------|-----------------|-------|-------|--------|-------|-----|------|------|------|-------|----|---|
|                 |        | 0               | 39.06 | 78.13 | 156.25 | 312.5 | 625 | 1250 | 2500 | 5000 | 10000 |    |   |
| Buparlisib [nM] | 0      | 100             | 91    | 87    | 83     | 76    | 67  | 51   | 43   | 31   | 21    | 14 | 8 |
|                 | 39.06  | 90              | 85    | 83    | 77     | 74    | 63  | 53   | 45   | 30   | 20    | 14 | 8 |
|                 | 78.13  | 92              | 87    | 84    | 76     | 65    | 53  | 48   | 39   | 25   | 15    | 9  | 5 |
|                 | 156.25 | 80              | 81    | 75    | 69     | 62    | 55  | 47   | 40   | 28   | 19    | 11 | 6 |
|                 | 312.5  | 80              | 73    | 74    | 65     | 56    | 49  | 43   | 39   | 27   | 18    | 10 | 6 |
|                 | 625    | 66              | 65    | 64    | 56     | 53    | 46  | 39   | 31   | 23   | 16    | 9  | 5 |
|                 | 1250   | 64              | 59    | 49    | 49     | 47    | 40  | 34   | 28   | 19   | 14    | 8  | 5 |
|                 | 2500   | 45              | 37    | 41    | 41     | 38    | 34  | 31   | 25   | 15   | 12    | 7  | 4 |
|                 | 5000   | 34              | 30    | 28    | 28     | 26    | 23  | 20   | 13   | 11   | 7     | 4  | 3 |
|                 | 10000  | 31              | 28    | 28    | 28     | 27    | 25  | 20   | 15   | 11   | 11    | 7  | 4 |

HS11

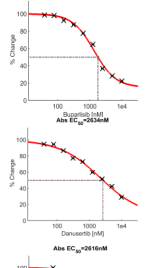

|                 |        | Danusertib [nM] |       |       |        |       |     |      |      |      |       |    |   |
|-----------------|--------|-----------------|-------|-------|--------|-------|-----|------|------|------|-------|----|---|
|                 |        | 0               | 39.06 | 78.13 | 156.25 | 312.5 | 625 | 1250 | 2500 | 5000 | 10000 |    |   |
| Buparlisib [nM] | 0      | 100             | 95    | 94    | 87     | 77    | 73  | 60   | 52   | 37   | 25    | 16 | 9 |
|                 | 39.06  | 99              | 93    | 92    | 83     | 86    | 71  | 60   | 51   | 45   | 27    | 16 | 9 |
|                 | 78.13  | 98              | 98    | 89    | 81     | 79    | 69  | 60   | 51   | 38   | 25    | 16 | 9 |
|                 | 156.25 | 92              | 91    | 89    | 78     | 74    | 68  | 56   | 49   | 36   | 23    | 13 | 8 |
|                 | 312.5  | 87              | 85    | 79    | 72     | 68    | 58  | 52   | 43   | 30   | 22    | 13 | 8 |
|                 | 625    | 78              | 75    | 71    | 65     | 59    | 51  | 48   | 43   | 31   | 23    | 13 | 8 |
|                 | 1250   | 65              | 59    | 53    | 49     | 50    | 44  | 39   | 35   | 23   | 16    | 9  | 5 |
|                 | 2500   | 53              | 48    | 43    | 39     | 41    | 36  | 33   | 28   | 20   | 14    | 8  | 5 |
|                 | 5000   | 43              | 39    | 35    | 31     | 30    | 27  | 23   | 21   | 17   | 13    | 8  | 5 |
|                 | 10000  | 40              | 35    | 32    | 28     | 28    | 24  | 21   | 18   | 14   | 14    | 8  | 5 |

HS04.3

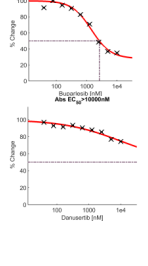

|                 |        | Danusertib [nM] |       |       |        |       |     |      |      |      |       |    |    |
|-----------------|--------|-----------------|-------|-------|--------|-------|-----|------|------|------|-------|----|----|
|                 |        | 0               | 39.06 | 78.13 | 156.25 | 312.5 | 625 | 1250 | 2500 | 5000 | 10000 |    |    |
| Buparlisib [nM] | 0      | 100             | 97    | 93    | 91     | 93    | 90  | 88   | 85   | 77   | 74    | 61 | 41 |
|                 | 39.06  | 91              | 91    | 97    | 96     | 99    | 97  | 87   | 85   | 81   | 76    | 61 | 41 |
|                 | 78.13  | 100             | 98    | 100   | 95     | 89    | 89  | 89   | 84   | 76   | 76    | 61 | 41 |
|                 | 156.25 | 95              | 87    | 83    | 90     | 89    | 88  | 88   | 83   | 76   | 74    | 61 | 41 |
|                 | 312.5  | 90              | 88    | 84    | 88     | 81    | 83  | 77   | 77   | 78   | 65    | 51 | 31 |
|                 | 625    | 78              | 75    | 71    | 65     | 59    | 51  | 48   | 43   | 31   | 23    | 13 | 8  |
|                 | 1250   | 71              | 64    | 64    | 63     | 65    | 63  | 61   | 61   | 63   | 55    | 41 | 21 |
|                 | 2500   | 46              | 44    | 46    | 46     | 50    | 53  | 53   | 52   | 52   | 47    | 31 | 21 |
|                 | 5000   | 37              | 37    | 35    | 35     | 32    | 32  | 44   | 43   | 46   | 41    | 26 | 16 |
|                 | 10000  | 35              | 33    | 33    | 33     | 32    | 32  | 40   | 37   | 38   | 31    | 21 | 16 |

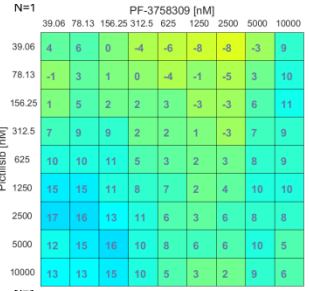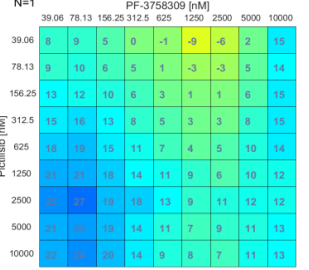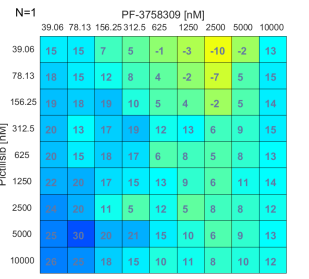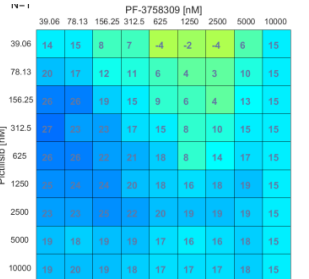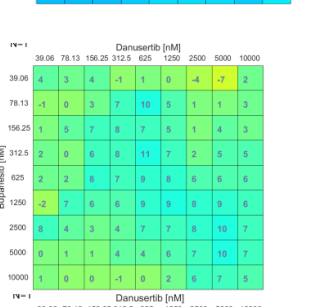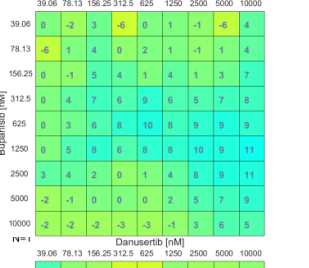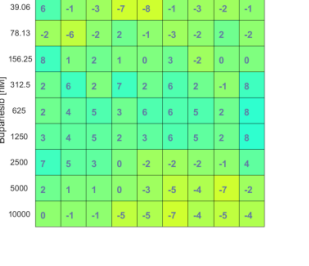

HS03

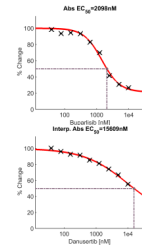

| Buparlisib [nM] | Danuserib [nM] |       |       |        |       |     |      |      |      |       |       |
|-----------------|----------------|-------|-------|--------|-------|-----|------|------|------|-------|-------|
|                 | 0              | 39.06 | 78.13 | 156.25 | 312.5 | 625 | 1250 | 2500 | 5000 | 10000 | 10000 |
| 0               | 100            | 100   | 96    | 93     | 91    | 85  | 81   | 74   | 67   | 55    | 40    |
| 39.06           | 98             | 96    | 91    | 96     | 97    | 87  | 80   | 74   | 66   | 56    | 40    |
| 78.13           | 94             | 97    | 96    | 96     | 83    | 77  | 71   | 65   | 56   | 45    | 30    |
| 156.25          | 95             | 89    | 85    | 85     | 88    | 81  | 71   | 67   | 60   | 52    | 35    |
| 312.5           | 93             | 92    | 89    | 84     | 83    | 73  | 70   | 67   | 58   | 47    | 30    |
| 625             | 83             | 83    | 79    | 74     | 76    | 70  | 63   | 61   | 52   | 41    | 25    |
| 1250            | 70             | 68    | 59    | 57     | 68    | 57  | 55   | 54   | 48   | 38    | 20    |
| 2500            | 42             | 42    | 43    | 44     | 40    | 47  | 46   | 43   | 37   | 27    | 15    |
| 5000            | 12             | 10    | 14    | 14     | 16    | 16  | 15   | 13   | 11   | 9     | 5     |
| 10000           | 1              | 1     | 1     | 1      | 1     | 1   | 1    | 1    | 1    | 1     | 1     |

HS12

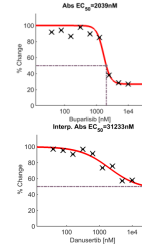

| Buparlisib [nM] | Danuserib [nM] |       |       |        |       |     |      |      |      |       |       |
|-----------------|----------------|-------|-------|--------|-------|-----|------|------|------|-------|-------|
|                 | 0              | 39.06 | 78.13 | 156.25 | 312.5 | 625 | 1250 | 2500 | 5000 | 10000 | 10000 |
| 0               | 100            | 97    | 95    | 91     | 97    | 91  | 73   | 76   | 67   | 58    | 40    |
| 39.06           | 92             | 92    | 85    | 86     | 87    | 75  | 71   | 64   | 48   | 35    | 20    |
| 78.13           | 94             | 99    | 96    | 88     | 79    | 76  | 71   | 68   | 53   | 50    | 30    |
| 156.25          | 87             | 79    | 79    | 78     | 88    | 71  | 69   | 64   | 52   | 43    | 25    |
| 312.5           | 98             | 87    | 82    | 86     | 75    | 70  | 77   | 57   | 52   | 43    | 25    |
| 625             | 90             | 80    | 69    | 71     | 67    | 74  | 69   | 56   | 45   | 40    | 20    |
| 1250            | 85             | 68    | 65    | 60     | 53    | 54  | 61   | 49   | 39   | 33    | 15    |
| 2500            | 59             | 52    | 55    | 42     | 46    | 49  | 47   | 41   | 35   | 25    | 10    |
| 5000            | 18             | 15    | 13    | 13     | 13    | 13  | 13   | 11   | 9    | 7     | 5     |
| 10000           | 1              | 1     | 1     | 1      | 1     | 1   | 1    | 1    | 1    | 1     | 1     |

MS01

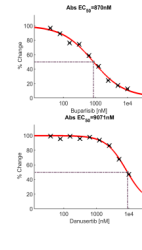

| Buparlisib [nM] | Danuserib [nM] |       |       |        |       |     |      |      |      |       |       |
|-----------------|----------------|-------|-------|--------|-------|-----|------|------|------|-------|-------|
|                 | 0              | 39.06 | 78.13 | 156.25 | 312.5 | 625 | 1250 | 2500 | 5000 | 10000 | 10000 |
| 0               | 100            | 99    | 96    | 99     | 96    | 98  | 94   | 86   | 68   | 47    | 25    |
| 39.06           | 97             | 93    | 92    | 100    | 97    | 104 | 92   | 81   | 74   | 48    | 25    |
| 78.13           | 89             | 92    | 92    | 90     | 92    | 93  | 84   | 74   | 65   | 48    | 25    |
| 156.25          | 76             | 72    | 77    | 78     | 89    | 91  | 84   | 76   | 61   | 46    | 20    |
| 312.5           | 74             | 75    | 78    | 75     | 77    | 87  | 81   | 68   | 48   | 37    | 15    |
| 625             | 59             | 60    | 55    | 62     | 64    | 61  | 61   | 49   | 45   | 30    | 10    |
| 1250            | 44             | 43    | 39    | 37     | 39    | 39  | 38   | 31   | 27   | 19    | 5     |
| 2500            | 18             | 15    | 15    | 12     | 14    | 15  | 15   | 10   | 14   | 10    | 5     |
| 5000            | 11             | 10    | 10    | 10     | 10    | 15  | 15   | 15   | 13   | 13    | 5     |
| 10000           | 1              | 1     | 1     | 1      | 1     | 1   | 1    | 1    | 1    | 1     | 1     |

### Buparlisib vs. Nintedanib

HS01

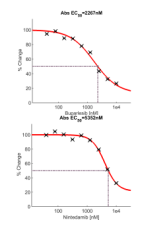

| Buparlisib [nM] | Nintedanib [nM] |       |       |        |       |     |      |      |      |       |       |
|-----------------|-----------------|-------|-------|--------|-------|-----|------|------|------|-------|-------|
|                 | 0               | 39.06 | 78.13 | 156.25 | 312.5 | 625 | 1250 | 2500 | 5000 | 10000 | 10000 |
| 0               | 100             | 100   | 100   | 100    | 93    | 99  | 92   | 79   | 52   | 26    | 10    |
| 39.06           | 95              | 104   | 96    | 98     | 95    | 92  | 83   | 47   | 31   | 20    | 10    |
| 78.13           | 98              | 95    | 99    | 94     | 87    | 91  | 87   | 78   | 42   | 26    | 10    |
| 156.25          | 89              | 90    | 95    | 98     | 89    | 94  | 80   | 76   | 61   | 38    | 15    |
| 312.5           | 88              | 91    | 82    | 85     | 84    | 84  | 79   | 73   | 50   | 30    | 10    |
| 625             | 78              | 81    | 77    | 73     | 71    | 70  | 69   | 65   | 51   | 30    | 10    |
| 1250            | 69              | 67    | 64    | 61     | 61    | 60  | 60   | 51   | 41   | 21    | 10    |
| 2500            | 43              | 46    | 41    | 45     | 46    | 56  | 41   | 37   | 13   | 13    | 5     |
| 5000            | 18              | 18    | 13    | 13     | 13    | 13  | 13   | 13   | 14   | 14    | 5     |
| 10000           | 1               | 1     | 1     | 1      | 1     | 1   | 1    | 1    | 1    | 1     | 1     |

HS11

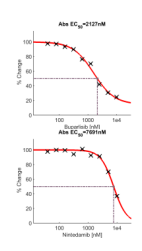

| Buparlisib [nM] | Nintedanib [nM] |       |       |        |       |     |      |      |      |       |       |
|-----------------|-----------------|-------|-------|--------|-------|-----|------|------|------|-------|-------|
|                 | 0               | 39.06 | 78.13 | 156.25 | 312.5 | 625 | 1250 | 2500 | 5000 | 10000 | 10000 |
| 0               | 100             | 98    | 100   | 100    | 94    | 101 | 93   | 91   | 70   | 37    | 10    |
| 39.06           | 98              | 94    | 98    | 100    | 96    | 94  | 90   | 86   | 63   | 36    | 10    |
| 78.13           | 97              | 97    | 98    | 96     | 98    | 94  | 89   | 83   | 63   | 31    | 10    |
| 156.25          | 93              | 99    | 96    | 97     | 94    | 94  | 85   | 75   | 68   | 38    | 10    |
| 312.5           | 90              | 93    | 89    | 88     | 85    | 83  | 82   | 74   | 50   | 31    | 10    |
| 625             | 76              | 80    | 84    | 77     | 72    | 73  | 66   | 56   | 49   | 30    | 10    |
| 1250            | 70              | 65    | 65    | 66     | 61    | 60  | 50   | 36   | 31   | 21    | 10    |
| 2500            | 42              | 41    | 40    | 41     | 40    | 58  | 31   | 29   | 18   | 15    | 5     |
| 5000            | 18              | 17    | 15    | 15     | 15    | 15  | 15   | 15   | 15   | 15    | 5     |
| 10000           | 1               | 1     | 1     | 1      | 1     | 1   | 1    | 1    | 1    | 1     | 1     |

HS04.3

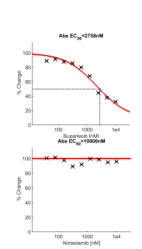

| Buparlisib [nM] | Nintedanib [nM] |       |       |        |       |     |      |      |      |       |       |
|-----------------|-----------------|-------|-------|--------|-------|-----|------|------|------|-------|-------|
|                 | 0               | 39.06 | 78.13 | 156.25 | 312.5 | 625 | 1250 | 2500 | 5000 | 10000 | 10000 |
| 0               | 100             | 100   | 102   | 98     | 89    | 92  | 100  | 99   | 95   | 96    | 10    |
| 39.06           | 89              | 92    | 91    | 96     | 99    | 101 | 95   | 94   | 93   | 83    | 10    |
| 78.13           | 91              | 93    | 96    | 98     | 99    | 95  | 97   | 93   | 92   | 96    | 10    |
| 156.25          | 88              | 88    | 93    | 90     | 94    | 93  | 96   | 90   | 93   | 90    | 10    |
| 312.5           | 86              | 86    | 89    | 93     | 90    | 88  | 90   | 89   | 90   | 88    | 10    |
| 625             | 80              | 83    | 79    | 81     | 80    | 80  | 81   | 81   | 81   | 76    | 10    |
| 1250            | 68              | 71    | 71    | 72     | 66    | 70  | 68   | 67   | 69   | 63    | 10    |
| 2500            | 45              | 49    | 47    | 46     | 47    | 58  | 47   | 40   | 51   | 46    | 10    |
| 5000            | 18              | 18    | 18    | 17     | 17    | 17  | 18   | 18   | 18   | 18    | 10    |
| 10000           | 1               | 1     | 1     | 1      | 1     | 1   | 1    | 1    | 1    | 1     | 1     |

HS03

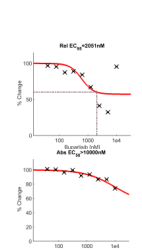

| Buparlisib [nM] | Nintedanib [nM] |       |       |        |       |     |      |      |      |       |       |
|-----------------|-----------------|-------|-------|--------|-------|-----|------|------|------|-------|-------|
|                 | 0               | 39.06 | 78.13 | 156.25 | 312.5 | 625 | 1250 | 2500 | 5000 | 10000 | 10000 |
| 0               | 100             | 101   | 100   | 96     | 100   | 92  | 94   | 87   | 87   | 74    | 10    |
| 39.06           | 97              | 93    | 95    | 97     | 94    | 96  | 92   | 90   | 83   | 66    | 10    |
| 78.13           | 96              | 96    | 95    | 97     | 89    | 94  | 93   | 89   | 82   | 72    | 10    |
| 156.25          | 87              | 89    | 94    | 91     | 90    | 91  | 89   | 84   | 85   | 71    | 10    |
| 312.5           | 89              | 92    | 88    | 93     | 89    | 86  | 85   | 80   | 75   | 66    | 10    |
| 625             | 84              | 86    | 84    | 83     | 80    | 81  | 77   | 76   | 73   | 61    | 10    |
| 1250            | 67              | 66    | 67    | 69     | 67    | 66  | 63   | 60   | 57   | 49    | 10    |
| 2500            | 41              | 42    | 44    | 43     | 41    | 44  | 41   | 41   | 40   | 36    | 10    |
| 5000            | 18              | 18    | 18    | 18     | 18    | 18  | 18   | 18   | 18   | 18    | 10    |
| 10000           | 1               | 1     | 1     | 1      | 1     | 1   | 1    | 1    | 1    | 1     | 1     |

| Buparlisib [nM] | Danuserib [nM] |       |       |        |       |     |      |      |      |       |       |
|-----------------|----------------|-------|-------|--------|-------|-----|------|------|------|-------|-------|
|                 | 0              | 39.06 | 78.13 | 156.25 | 312.5 | 625 | 1250 | 2500 | 5000 | 10000 | 10000 |
| 0               | 1              | 4     | -2    | -7     | -1    | 0   | -1   | -1   | 0    | 0     | 0     |
| 39.06           | 1              | -1    | 3     | 1      | 3     | 3   | 2    | 2    | 1    | 1     | 0     |
| 78.13           | 6              | 8     | 6     | 0      | 3     | 8   | 5    | 4    | 3    | 3     | 0     |
| 156.25          | 0              | 2     | 4     | 3      | 9     | 7   | 3    | 4    | 6    | 6     | 0     |
| 312.5           | 6              | 3     | 6     | 3      | 5     | 6   | 5    | 7    | 16   | 16    | 0     |
| 625             | -2             | 6     | 6     | 3      | 5     | 5   | 2    | 4    | 7    | 7     | 0     |
| 1250            | 3              | 2     | 1     | -1     | -2    | -2  | 0    | 1    | 8    | 8     | 0     |
| 2500            | -1             | -1    | -2    | -3     | -4    | -4  | -2   | 0    | 4    | 4     | 0     |
| 5000            | 2              | -3    | -4    | -3     | -6    | -2  | -3   | -3   | 3    | 3     | 0     |

| Buparlisib [nM] | Danuserib [nM] |       |       |        |       |     |      |      |      |       |       |
|-----------------|----------------|-------|-------|--------|-------|-----|------|------|------|-------|-------|
|                 | 0              | 39.06 | 78.13 | 156.25 | 312.5 | 625 | 1250 | 2500 | 5000 | 10000 | 10000 |
| 0               | 7              | 6     | 11    | 6      | 0     | 3   | -1   | -2   | 8    | 8     | 0     |
| 39.06           | 0              | 1     | 7     | 13     | 10    | 7   | 2    | 8    | 6    | 6     | 0     |
| 78.13           | 19             | 16    | 17    | 3      | 14    | 9   | 6    | 9    | 12   | 12    | 0     |
| 156.25          | 11             | 15    | 9     | 15     | 16    | -1  | 11   | 8    | 12   | 12    | 0     |
| 312.5           | 15             | 7     | 20    | 16     | 6     | 3   | 9    | 13   | 13   | 13    | 0     |
| 625             | 10             | 14    | 16    | 20     | 14    | 2   | 8    | 16   | 16   | 16    | 0     |
| 1250            | 5              | 0     | -3    | -7     | -10   | -7  | -2   | 3    | 8    | 8     | 0     |
| 2500            | -4             | -5    | -2    | -5     | -6    | -5  | -4   | 1    | 2    | 2     | 0     |
| 5000            | 2              | 1     | -3    | 2      | 1     | 2   | 2    | 3    | 4    | 4     | 0     |
| 10000           | -3             | -2    | -2    | -2     | -3    | -1  | -1   | 0    | 1    | 1     | 0     |

| Buparlisib [nM] | Danuserib [nM] |       |       |        |       |     |      |      |      |       |       |
|-----------------|----------------|-------|-------|--------|-------|-----|------|------|------|-------|-------|
|                 | 0              | 39.06 | 78.13 | 156.25 | 312.5 | 625 | 1250 | 2500 | 5000 | 10000 | 10000 |
| 0               | 1              | 2     | -6    | -4     | -13   | -4  | -1   | -8   | 0    | 0     | 0     |
| 39.06           | -2             | -3    | -1    | -4     | -7    | -1  | 2    | -2   | 5    | 5     | 0     |
| 78.13           | 10             | 5     | 3     | -7     | -10   | -4  | -4   | 3    | 5    | 5     | 0     |
| 156.25          | -4             | -7    | -4    | -7     | -2    | 5   | 4    | 6    | 8    | 8     | 0     |
| 312.5           | -3             | 2     | -6    | -7     | -6    | -8  | 1    | -1   | 7    | 7     | 0     |
| 625             | -1             | 3     | 6     | 2      | 2     | 4   | 7    | 7    | 9    |       |       |

HS12

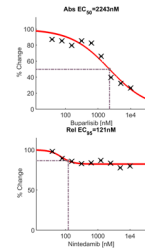

|        | Nintedanib [nM] |       |       |        |       |     |      |      |      |       |  |
|--------|-----------------|-------|-------|--------|-------|-----|------|------|------|-------|--|
|        | 0               | 39.06 | 78.13 | 156.25 | 312.5 | 625 | 1250 | 2500 | 5000 | 10000 |  |
| 0      | 100             | 98    | 89    | 86     | 83    | 84  | 87   | 83   | 78   | 80    |  |
| 39.06  | 87              | 96    | 94    | 88     | 84    | 93  | 99   | 93   | 87   | 81    |  |
| 78.13  | 85              | 85    | 85    | 85     | 85    | 86  | 88   | 82   | 77   | 79    |  |
| 156.25 | 80              | 99    | 96    | 89     | 83    | 84  | 87   | 84   | 83   | 75    |  |
| 312.5  | 85              | 85    | 86    | 83     | 83    | 81  | 79   | 76   | 75   | 70    |  |
| 625    | 83              | 90    | 86    | 79     | 82    | 81  | 88   | 79   | 72   | 63    |  |
| 1250   | 66              | 66    | 66    | 64     | 64    | 64  | 64   | 63   | 61   | 61    |  |
| 2500   | 40              | 45    | 42    | 40     | 33    | 40  | 37   | 41   | 42   | 39    |  |
| 5000   | 15              | 15    | 15    | 15     | 15    | 15  | 15   | 15   | 15   | 15    |  |
| 10000  | 10              | 10    | 10    | 10     | 10    | 10  | 10   | 10   | 10   | 10    |  |

MS01

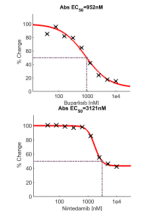

|        | Nintedanib [nM] |       |       |        |       |     |      |      |      |       |  |
|--------|-----------------|-------|-------|--------|-------|-----|------|------|------|-------|--|
|        | 0               | 39.06 | 78.13 | 156.25 | 312.5 | 625 | 1250 | 2500 | 5000 | 10000 |  |
| 0      | 100             | 101   | 101   | 99     | 97    | 98  | 86   | 55   | 46   | 42    |  |
| 39.06  | 85              | 103   | 97    | 93     | 89    | 89  | 64   | 52   | 49   | 43    |  |
| 78.13  | 96              | 99    | 100   | 92     | 90    | 89  | 75   | 55   | 47   | 43    |  |
| 156.25 | 82              | 92    | 84    | 86     | 89    | 83  | 69   | 57   | 46   | 39    |  |
| 312.5  | 79              | 84    | 78    | 75     | 70    | 66  | 56   | 45   | 38   | 50    |  |
| 625    | 65              | 65    | 64    | 61     | 52    | 55  | 56   | 41   | 35   | 31    |  |
| 1250   | 42              | 38    | 39    | 37     | 42    | 39  | 39   | 30   | 23   | 24    |  |
| 2500   | 22              | 22    | 22    | 20     | 20    | 21  | 16   | 17   | 17   | 17    |  |
| 5000   | 18              | 16    | 16    | 16     | 15    | 14  | 14   | 12   | 12   | 10    |  |
| 10000  | 15              | 16    | 15    | 13     | 13    | 12  | 11   | 10   | 9    | 7     |  |

### Ompalisib vs. TAE226

HS01

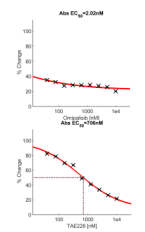

|        | TAE226 [nM] |       |       |        |       |     |      |      |      |       |  |
|--------|-------------|-------|-------|--------|-------|-----|------|------|------|-------|--|
|        | 0           | 39.06 | 78.13 | 156.25 | 312.5 | 625 | 1250 | 2500 | 5000 | 10000 |  |
| 0      | 100         | 82    | 79    | 70     | 67    | 49  | 41   | 34   | 26   | 22    |  |
| 39.06  | 81          | 74    | 70    | 65     | 55    | 45  | 33   | 21   | 17   | 15    |  |
| 78.13  | 81          | 69    | 65    | 55     | 45    | 35  | 24   | 12   | 11   | 11    |  |
| 156.25 | 71          | 59    | 54    | 45     | 35    | 25  | 22   | 21   | 18   | 15    |  |
| 312.5  | 60          | 56    | 50    | 42     | 35    | 25  | 20   | 15   | 13   | 15    |  |
| 625    | 38          | 47    | 40    | 30     | 25    | 20  | 13   | 11   | 14   | 14    |  |
| 1250   | 30          | 35    | 30    | 25     | 20    | 15  | 12   | 14   | 14   | 14    |  |
| 2500   | 17          | 24    | 20    | 15     | 15    | 12  | 10   | 14   | 12   | 13    |  |
| 5000   | 10          | 22    | 21    | 21     | 20    | 16  | 14   | 13   | 13   | 13    |  |
| 10000  | 10          | 15    | 17    | 15     | 15    | 15  | 14   | 14   | 14   | 14    |  |

HS11

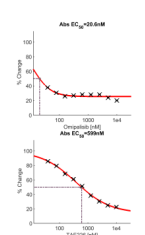

|        | TAE226 [nM] |       |       |        |       |     |      |      |      |       |  |
|--------|-------------|-------|-------|--------|-------|-----|------|------|------|-------|--|
|        | 0           | 39.06 | 78.13 | 156.25 | 312.5 | 625 | 1250 | 2500 | 5000 | 10000 |  |
| 0      | 100         | 86    | 79    | 68     | 61    | 51  | 38   | 26   | 16   | 15    |  |
| 39.06  | 81          | 74    | 65    | 55     | 45    | 35  | 24   | 12   | 11   | 11    |  |
| 78.13  | 81          | 69    | 65    | 55     | 45    | 35  | 24   | 12   | 11   | 11    |  |
| 156.25 | 69          | 59    | 54    | 45     | 35    | 25  | 22   | 21   | 22   | 17    |  |
| 312.5  | 57          | 49    | 45    | 35     | 25    | 20  | 15   | 13   | 15   | 15    |  |
| 625    | 38          | 47    | 40    | 30     | 25    | 20  | 13   | 11   | 14   | 14    |  |
| 1250   | 30          | 35    | 30    | 25     | 20    | 15  | 12   | 14   | 14   | 14    |  |
| 2500   | 17          | 24    | 20    | 15     | 15    | 12  | 10   | 14   | 12   | 13    |  |
| 5000   | 10          | 22    | 21    | 21     | 20    | 16  | 14   | 13   | 13   | 13    |  |
| 10000  | 10          | 15    | 17    | 15     | 15    | 15  | 14   | 14   | 14   | 14    |  |

HS04.3

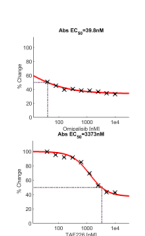

|        | TAE226 [nM] |       |       |        |       |     |      |      |      |       |  |
|--------|-------------|-------|-------|--------|-------|-----|------|------|------|-------|--|
|        | 0           | 39.06 | 78.13 | 156.25 | 312.5 | 625 | 1250 | 2500 | 5000 | 10000 |  |
| 0      | 100         | 100   | 95    | 92     | 85    | 70  | 53   | 43   | 43   | 43    |  |
| 39.06  | 81          | 89    | 89    | 89     | 87    | 84  | 42   | 32   | 37   | 37    |  |
| 78.13  | 86          | 40    | 45    | 47     | 42    | 43  | 39   | 39   | 40   | 40    |  |
| 156.25 | 80          | 41    | 43    | 42     | 38    | 37  | 31   | 36   | 35   | 37    |  |
| 312.5  | 61          | 39    | 40    | 38     | 38    | 37  | 37   | 36   | 36   | 36    |  |
| 625    | 39          | 37    | 37    | 37     | 37    | 37  | 34   | 34   | 34   | 34    |  |
| 1250   | 30          | 30    | 31    | 30     | 30    | 30  | 28   | 28   | 28   | 28    |  |
| 2500   | 27          | 30    | 30    | 31     | 30    | 30  | 28   | 28   | 28   | 28    |  |
| 5000   | 28          | 30    | 30    | 30     | 30    | 30  | 28   | 28   | 28   | 28    |  |
| 10000  | 30          | 30    | 30    | 30     | 30    | 30  | 28   | 28   | 28   | 28    |  |

HS03

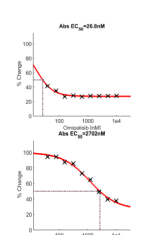

|        | TAE226 [nM] |       |       |        |       |     |      |      |      |       |  |
|--------|-------------|-------|-------|--------|-------|-----|------|------|------|-------|--|
|        | 0           | 39.06 | 78.13 | 156.25 | 312.5 | 625 | 1250 | 2500 | 5000 | 10000 |  |
| 0      | 100         | 95    | 95    | 87     | 86    | 73  | 65   | 49   | 46   | 39    |  |
| 39.06  | 85          | 42    | 41    | 40     | 42    | 38  | 35   | 31   | 31   | 31    |  |
| 78.13  | 81          | 32    | 31    | 31     | 34    | 31  | 31   | 30   | 30   | 30    |  |
| 156.25 | 76          | 30    | 30    | 30     | 30    | 30  | 28   | 28   | 28   | 28    |  |
| 312.5  | 61          | 30    | 30    | 30     | 30    | 30  | 28   | 28   | 28   | 28    |  |
| 625    | 39          | 37    | 37    | 37     | 37    | 37  | 34   | 34   | 34   | 34    |  |
| 1250   | 30          | 30    | 30    | 30     | 30    | 30  | 28   | 28   | 28   | 28    |  |
| 2500   | 28          | 30    | 30    | 31     | 30    | 30  | 28   | 28   | 28   | 28    |  |
| 5000   | 28          | 30    | 30    | 30     | 30    | 30  | 28   | 28   | 28   | 28    |  |
| 10000  | 30          | 30    | 30    | 30     | 30    | 30  | 28   | 28   | 28   | 28    |  |

HS12

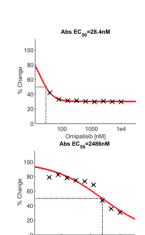

|        | TAE226 [nM] |       |       |        |       |     |      |      |      |       |  |
|--------|-------------|-------|-------|--------|-------|-----|------|------|------|-------|--|
|        | 0           | 39.06 | 78.13 | 156.25 | 312.5 | 625 | 1250 | 2500 | 5000 | 10000 |  |
| 0      | 100         | 79    | 83    | 78     | 75    | 73  | 69   | 47   | 30   | 25    |  |
| 39.06  | 82          | 30    | 30    | 30     | 30    | 30  | 30   | 28   | 28   | 28    |  |
| 78.13  | 81          | 30    | 30    | 30     | 30    | 30  | 30   | 28   | 28   | 28    |  |
| 156.25 | 67          | 30    | 30    | 30     | 30    | 30  | 30   | 28   | 28   | 28    |  |
| 312.5  | 61          | 30    | 30    | 30     | 30    | 30  | 30   | 28   | 28   | 28    |  |
| 625    | 39          | 37    | 37    | 37     | 37    | 37  | 34   | 34   | 34   | 34    |  |
| 1250   | 30          | 30    | 30    | 30     | 30    | 30  | 28   | 28   | 28   | 28    |  |
| 2500   | 27          | 30    | 30    | 30     | 30    | 30  | 28   | 28   | 28   | 28    |  |
| 5000   | 28          | 30    | 30    | 30     | 30    | 30  | 28   | 28   | 28   | 28    |  |
| 10000  | 30          | 30    | 30    | 30     | 30    | 30  | 28   | 28   | 28   | 28    |  |

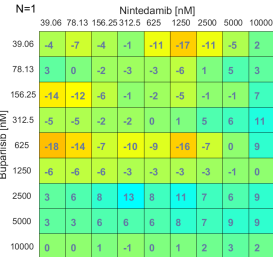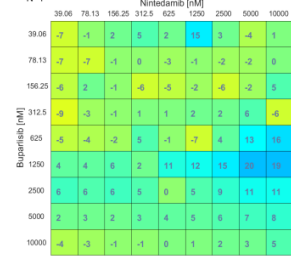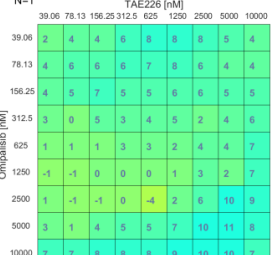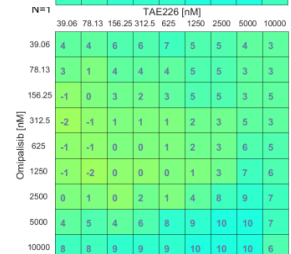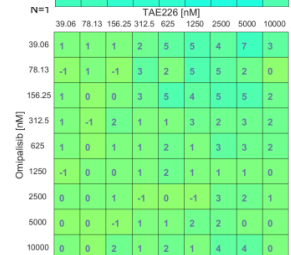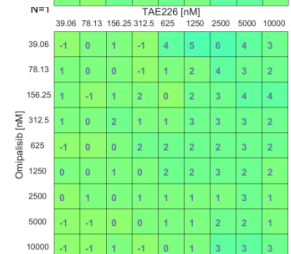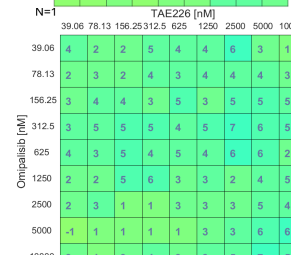

MS01

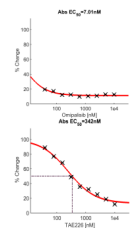

| Ompalsib [nM] | TAE226 [nM] |       |       |        |       |     |      |      |      |       |  |
|---------------|-------------|-------|-------|--------|-------|-----|------|------|------|-------|--|
|               | 0           | 39.06 | 78.13 | 156.25 | 312.5 | 625 | 1250 | 2500 | 5000 | 10000 |  |
| 0             | 100         | 89    | 77    | 68     | 49    | 38  | 33   | 33   | 19   | 12    |  |
| 39.06         | 77          | 15    | 14    | 13     | 12    | 12  | 11   | 10   | 10   | 8     |  |
| 78.13         | 52          | 11    | 11    | 10     | 10    | 9   | 10   | 9    | 8    | 7     |  |
| 156.25        | 42          | 11    | 11    | 10     | 10    | 9   | 9    | 9    | 8    | 7     |  |
| 312.5         | 33          | 11    | 11    | 10     | 10    | 9   | 9    | 9    | 8    | 7     |  |
| 625           | 10          | 9     | 9     | 8      | 8     | 8   | 8    | 7    | 7    | 7     |  |
| 1250          | 11          | 11    | 10    | 10     | 10    | 10  | 10   | 9    | 8    | 8     |  |
| 2500          | 11          | 10    | 10    | 10     | 10    | 9   | 11   | 10   | 9    | 7     |  |
| 5000          | 10          | 13    | 12    | 12     | 12    | 13  | 13   | 12   | 11   | 9     |  |
| 10000         | 13          | 12    | 12    | 12     | 13    | 12  | 13   | 11   | 10   | 9     |  |

| Ompalsib [nM] | TAE226 [nM] |       |       |        |       |     |      |      |      |       |  |
|---------------|-------------|-------|-------|--------|-------|-----|------|------|------|-------|--|
|               | 0           | 39.06 | 78.13 | 156.25 | 312.5 | 625 | 1250 | 2500 | 5000 | 10000 |  |
| 0             | 2           | 4     | 5     | 5      | 5     | 5   | 5    | 7    |      |       |  |
| 39.06         | 1           | 2     | 3     | 3      | 3     | 4   | 5    | 4    | 6    |       |  |
| 78.13         | 3           | 3     | 3     | 3      | 4     | 4   | 5    | 5    | 6    |       |  |
| 156.25        | 2           | 2     | 3     | 2      | 3     | 3   | 3    | 4    | 5    |       |  |
| 312.5         | 3           | 3     | 3     | 4      | 4     | 4   | 4    | 4    | 5    |       |  |
| 625           | 1           | 2     | 2     | 1      | 1     | 2   | 3    | 3    | 4    |       |  |
| 1250          | 1           | 1     | 1     | 1      | 1     | 1   | 1    | 2    | 4    |       |  |
| 2500          | -2          | -1    | -1    | -1     | -2    | -1  | -1   | 1    | 2    |       |  |
| 5000          | -2          | -1    | 0     | -2     | 0     | -1  | 1    | 1    | 3    |       |  |
| 10000         | -1          | -1    | 0     | -2     | 0     | -1  | 1    | 1    | 3    |       |  |

HS01

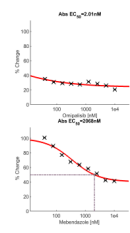

| Ompalsib [nM] | Mebendazole [nM] |       |       |        |       |     |      |      |      |       |  |
|---------------|------------------|-------|-------|--------|-------|-----|------|------|------|-------|--|
|               | 0                | 39.06 | 78.13 | 156.25 | 312.5 | 625 | 1250 | 2500 | 5000 | 10000 |  |
| 0             | 100              | 101   | 89    | 77     | 68    | 54  | 55   | 49   | 45   | 41    |  |
| 39.06         | 77               | 77    | 68    | 54     | 54    | 49  | 45   | 45   | 41   | 37    |  |
| 78.13         | 52               | 49    | 49    | 44     | 44    | 44  | 44   | 44   | 44   | 41    |  |
| 156.25        | 42               | 49    | 49    | 44     | 44    | 44  | 44   | 44   | 44   | 41    |  |
| 312.5         | 33               | 49    | 49    | 44     | 44    | 44  | 44   | 44   | 44   | 41    |  |
| 625           | 10               | 49    | 49    | 44     | 44    | 44  | 44   | 44   | 44   | 41    |  |
| 1250          | 11               | 49    | 49    | 44     | 44    | 44  | 44   | 44   | 44   | 41    |  |
| 2500          | 11               | 49    | 49    | 44     | 44    | 44  | 44   | 44   | 44   | 41    |  |
| 5000          | 10               | 49    | 49    | 44     | 44    | 44  | 44   | 44   | 44   | 41    |  |
| 10000         | 13               | 49    | 49    | 44     | 44    | 44  | 44   | 44   | 44   | 41    |  |

| Ompalsib [nM] | Mebendazole [nM] |       |       |        |       |     |      |      |      |       |  |
|---------------|------------------|-------|-------|--------|-------|-----|------|------|------|-------|--|
|               | 0                | 39.06 | 78.13 | 156.25 | 312.5 | 625 | 1250 | 2500 | 5000 | 10000 |  |
| 0             | -1               | -1    | 0     | 1      | 2     | 4   | 6    | 5    | 7    |       |  |
| 39.06         | 2                | 3     | 2     | 4      | 4     | 4   | 5    | 5    | 5    |       |  |
| 78.13         | 4                | 1     | 1     | 1      | 1     | 2   | 4    | 1    | 4    |       |  |
| 156.25        | -1               | 1     | 2     | 1      | 0     | 2   | 3    | 2    | 3    |       |  |
| 312.5         | -2               | 0     | -2    | 0      | 1     | 0   | 1    | 3    | 3    |       |  |
| 625           | -4               | -3    | 0     | 0      | 2     | 4   | 5    | 6    | 6    |       |  |
| 1250          | -2               | 0     | 0     | 3      | 4     | 5   | 6    | 7    | 7    |       |  |
| 2500          | 1                | 1     | 4     | 3      | 5     | 6   | 8    | 8    | 8    |       |  |
| 5000          | 5                | 6     | 6     | 7      | 7     | 8   | 9    | 10   | 10   |       |  |
| 10000         | 6                | 6     | 6     | 7      | 7     | 8   | 9    | 10   | 10   |       |  |

HS11

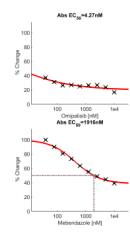

| Ompalsib [nM] | Mebendazole [nM] |       |       |        |       |     |      |      |      |       |  |
|---------------|------------------|-------|-------|--------|-------|-----|------|------|------|-------|--|
|               | 0                | 39.06 | 78.13 | 156.25 | 312.5 | 625 | 1250 | 2500 | 5000 | 10000 |  |
| 0             | 100              | 100   | 90    | 81     | 73    | 64  | 55   | 49   | 45   | 39    |  |
| 39.06         | 77               | 77    | 68    | 54     | 54    | 49  | 45   | 45   | 41   | 37    |  |
| 78.13         | 52               | 49    | 49    | 44     | 44    | 44  | 44   | 44   | 44   | 41    |  |
| 156.25        | 42               | 49    | 49    | 44     | 44    | 44  | 44   | 44   | 44   | 41    |  |
| 312.5         | 33               | 49    | 49    | 44     | 44    | 44  | 44   | 44   | 44   | 41    |  |
| 625           | 10               | 49    | 49    | 44     | 44    | 44  | 44   | 44   | 44   | 41    |  |
| 1250          | 11               | 49    | 49    | 44     | 44    | 44  | 44   | 44   | 44   | 41    |  |
| 2500          | 11               | 49    | 49    | 44     | 44    | 44  | 44   | 44   | 44   | 41    |  |
| 5000          | 10               | 49    | 49    | 44     | 44    | 44  | 44   | 44   | 44   | 41    |  |
| 10000         | 13               | 49    | 49    | 44     | 44    | 44  | 44   | 44   | 44   | 41    |  |

| Ompalsib [nM] | Mebendazole [nM] |       |       |        |       |     |      |      |      |       |  |
|---------------|------------------|-------|-------|--------|-------|-----|------|------|------|-------|--|
|               | 0                | 39.06 | 78.13 | 156.25 | 312.5 | 625 | 1250 | 2500 | 5000 | 10000 |  |
| 0             | -1               | -1    | 0     | -4     | 5     | 10  | 11   | 10   | 13   |       |  |
| 39.06         | 3                | 1     | 3     | 4      | 6     | 7   | 8    | 9    | 9    |       |  |
| 78.13         | 4                | 3     | 3     | 3      | 5     | 5   | 6    | 7    | 10   |       |  |
| 156.25        | 1                | 1     | 2     | 1      | 2     | 3   | 4    | 4    | 5    |       |  |
| 312.5         | -1               | -1    | -1    | 0      | 0     | 1   | 3    | 4    | 4    |       |  |
| 625           | -3               | -2    | -2    | -2     | 2     | 1   | 2    | 3    | 4    |       |  |
| 1250          | -3               | -2    | -1    | 0      | 1     | 3   | 3    | 4    | 3    |       |  |
| 2500          | 0                | 1     | 3     | 1      | 3     | 5   | 6    | 6    | 6    |       |  |
| 5000          | 4                | 5     | 4     | 4      | 5     | 6   | 7    | 6    | 6    |       |  |
| 10000         | 4                | 5     | 4     | 4      | 5     | 6   | 7    | 6    | 6    |       |  |

HS04.3

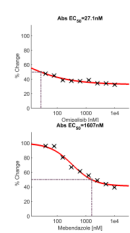

| Ompalsib [nM] | Mebendazole [nM] |       |       |        |       |     |      |      |      |       |  |
|---------------|------------------|-------|-------|--------|-------|-----|------|------|------|-------|--|
|               | 0                | 39.06 | 78.13 | 156.25 | 312.5 | 625 | 1250 | 2500 | 5000 | 10000 |  |
| 0             | 100              | 96    | 96    | 80     | 67    | 61  | 56   | 49   | 44   | 39    |  |
| 39.06         | 77               | 77    | 68    | 54     | 54    | 49  | 45   | 45   | 41   | 37    |  |
| 78.13         | 52               | 49    | 49    | 44     | 44    | 44  | 44   | 44   | 44   | 41    |  |
| 156.25        | 42               | 49    | 49    | 44     | 44    | 44  | 44   | 44   | 44   | 41    |  |
| 312.5         | 33               | 49    | 49    | 44     | 44    | 44  | 44   | 44   | 44   | 41    |  |
| 625           | 10               | 49    | 49    | 44     | 44    | 44  | 44   | 44   | 44   | 41    |  |
| 1250          | 11               | 49    | 49    | 44     | 44    | 44  | 44   | 44   | 44   | 41    |  |
| 2500          | 11               | 49    | 49    | 44     | 44    | 44  | 44   | 44   | 44   | 41    |  |
| 5000          | 10               | 49    | 49    | 44     | 44    | 44  | 44   | 44   | 44   | 41    |  |
| 10000         | 13               | 49    | 49    | 44     | 44    | 44  | 44   | 44   | 44   | 41    |  |

| Ompalsib [nM] | Mebendazole [nM] |       |       |        |       |     |      |      |      |       |  |
|---------------|------------------|-------|-------|--------|-------|-----|------|------|------|-------|--|
|               | 0                | 39.06 | 78.13 | 156.25 | 312.5 | 625 | 1250 | 2500 | 5000 | 10000 |  |
| 0             | -5               | -3    | -1    | -2     | 2     | 6   | 6    | 5    | 8    |       |  |
| 39.06         | -3               | -4    | 1     | 0      | 5     | 6   | 6    | 8    | 8    |       |  |
| 78.13         | 1                | 2     | 3     | 1      | 3     | 4   | 6    | 7    |      |       |  |
| 156.25        | -1               | -2    | -1    | 2      | 2     | 3   | 2    | 3    | 5    |       |  |
| 312.5         | 1                | 0     | 1     | 0      | 0     | -1  | 2    | 4    |      |       |  |
| 625           | -1               | -1    | -3    | -2     | -1    | -1  | -1   | -3   | 0    |       |  |
| 1250          | -1               | 0     | -2    | -2     | -1    | -2  | -3   | -2   | -2   |       |  |
| 2500          | -1               | 0     | -1    | 0      | -1    | -3  | -3   | -1   | 0    |       |  |
| 5000          | 2                | 2     | 0     | 0      | -2    | -2  | 0    | 0    | 2    |       |  |
| 10000         | 2                | 2     | 0     | 0      | -2    | -2  | 0    | 0    | 2    |       |  |

HS03

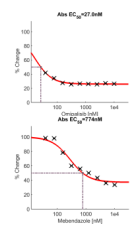

| Ompalsib [nM] | Mebendazole [nM] |       |       |        |       |     |      |      |      |       |  |
|---------------|------------------|-------|-------|--------|-------|-----|------|------|------|-------|--|
|               | 0                | 39.06 | 78.13 | 156.25 | 312.5 | 625 | 1250 | 2500 | 5000 | 10000 |  |
| 0             | 100              | 98    | 96    | 78     | 60    | 56  | 50   | 43   | 39   | 34    |  |
| 39.06         | 77               | 77    | 68    | 54     | 54    | 49  | 45   | 45   | 41   | 37    |  |
| 78.13         | 52               | 49    | 49    | 44     | 44    | 44  | 44   | 44   | 44   | 41    |  |
| 156.25        | 42               | 49    | 49    | 44     | 44    | 44  | 44   | 44   | 44   | 41    |  |
| 312.5         | 33               | 49    | 49    | 44     | 44    | 44  | 44   | 44   | 44   | 41    |  |
| 625           | 10               | 49    | 49    | 44     | 44    | 44  | 44   | 44   | 44   | 41    |  |
| 1250          | 11               | 49    | 49    | 44     | 44    | 44  | 44   | 44   | 44   | 41    |  |
| 2500          | 11               | 49    | 49    | 44     | 44    | 44  | 44   | 44   | 44   | 41    |  |
| 5000          | 10               | 49    | 49    | 44     | 44    | 44  | 44   | 44   | 44   | 41    |  |
| 10000         | 13               | 49    | 49    | 44     | 44    | 44  | 44   | 44   | 44   | 41    |  |

| Ompalsib [nM] | Mebendazole [nM] |       |       |        |       |     |      |      |      |       |  |
|---------------|------------------|-------|-------|--------|-------|-----|------|------|------|-------|--|
|               | 0                | 39.06 | 78.13 | 156.25 | 312.5 | 625 | 1250 | 2500 | 5000 | 10000 |  |
| 0             | 1                | -1    | 3     | -1     | 3     | 7   | 7    | 8    | 12   |       |  |
| 39.06         | -1               | 0     | 1     | 2      | 3     | 3   | 4    | 6    | 7    |       |  |
| 78.13         | 0                | 1     | 1     | 1      | 3     | 2   | 3    | 3    | 5    |       |  |
| 156.25        | 1                | 0     | 1     | 1      | 0     | 2   | 1    | 2    | 3    |       |  |
| 312.5         | 1                | 1     | 0     | -1     | 0     | 1   | 0    | 2    |      |       |  |
| 625           | -1               | 0     | -1    | -1     | -1    | -1  | -1   | -2   | 2    |       |  |
| 1250          | 1                | 0     | -1    | -3     | -2    | -2  | -1   | 0    | 0    |       |  |
| 2500          | -1               | -1    | -1    | -3     | -3    | -3  | -1   | -2   | 0    |       |  |
| 5000          | 0                | 1     | -1    | -2     | -1    | -2  | -1   | -1   | 1    |       |  |
| 10000         | 0                | 1     | -1    | -2     | -1    | -2  | -1   | -1   | 1    |       |  |

HS12

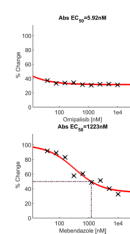

| Ompalsib [nM] | Mebendazole [nM] |       |       |        |       |     |      |      |      |       |  |
|---------------|------------------|-------|-------|--------|-------|-----|------|------|------|-------|--|
|               | 0                | 39.06 | 78.13 | 156.25 | 312.5 | 625 | 1250 | 2500 | 5000 | 10000 |  |
| 0             | 100              | 92    | 89    | 83     | 58    | 61  | 49   | 51   | 40   | 34    |  |
| 39.06         | 77               | 77    | 68    | 54     | 54    |     |      |      |      |       |  |

HS01

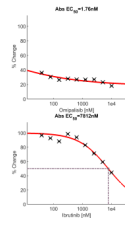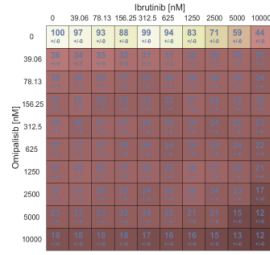

HS11

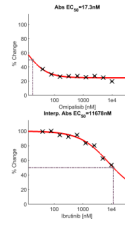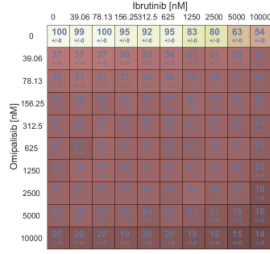

HS04.3

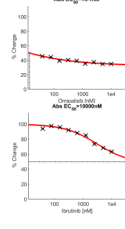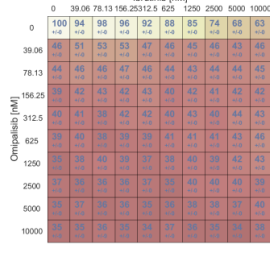

HS03

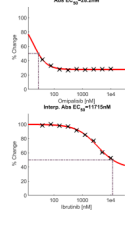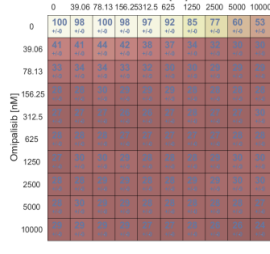

HS12

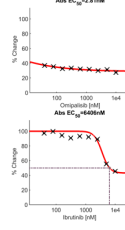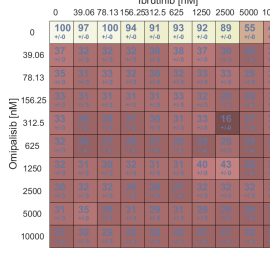

MS01

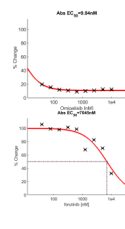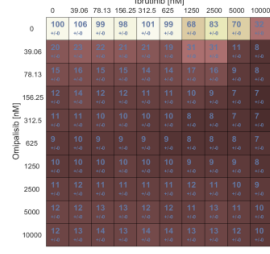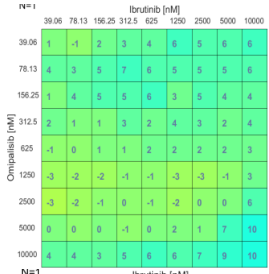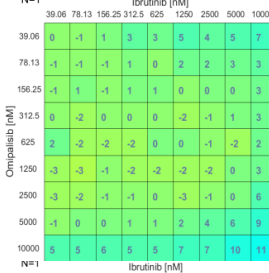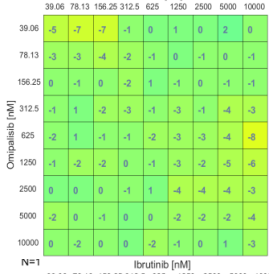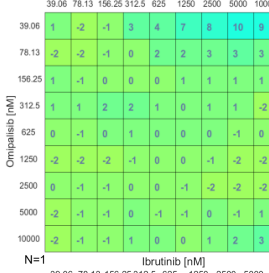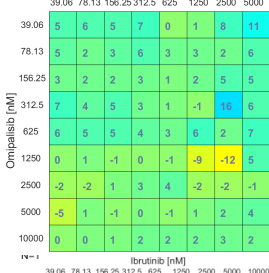

## Supplementary Figure S2

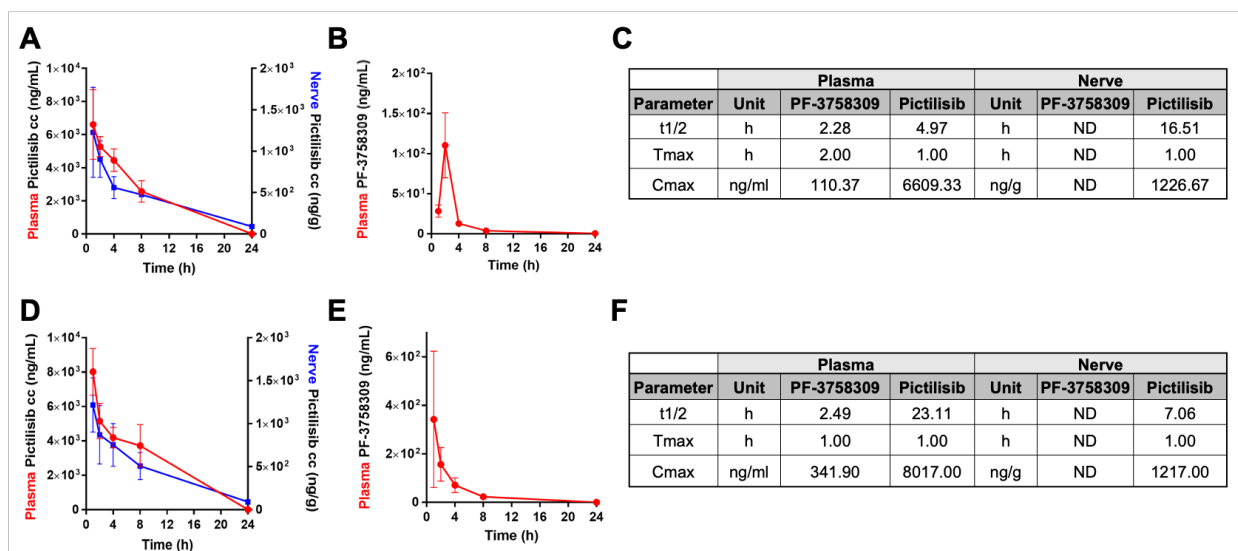

**Supplementary Figure S2.** Pharmacokinetic analysis of pictilisib and PF-3758309 as monotherapies and in combination after a single dose. (A) Plot of monotherapeutic pictilisib concentration as a function of time (plasma shown in red, nerve shown in blue). (B) Plot of monotherapeutic PF-3758309 concentration in plasma as a function of time (not detected in nerve). (C) Pictilisib and PF-3758309 pharmacokinetic parameters when delivered as monotherapeutics. (D) Plot of pictilisib concentration in the presence of PF-3758309 as a function of time (plasma shown in red, nerve shown in blue). (E) Plot of PF-3758309 concentration in plasma in the presence of pictilisib as a function of time (not detected in nerve). (F) Pictilisib and PF-3758309 pharmacokinetic parameters when delivered in combination. Data in graphs shown as mean±SEM. t1/2: plasma/nerve half-life; Tmax: time to maximum plasma/nerve concentration; Cmax: peak plasma/nerve concentration



### Suupplementary Figure S3

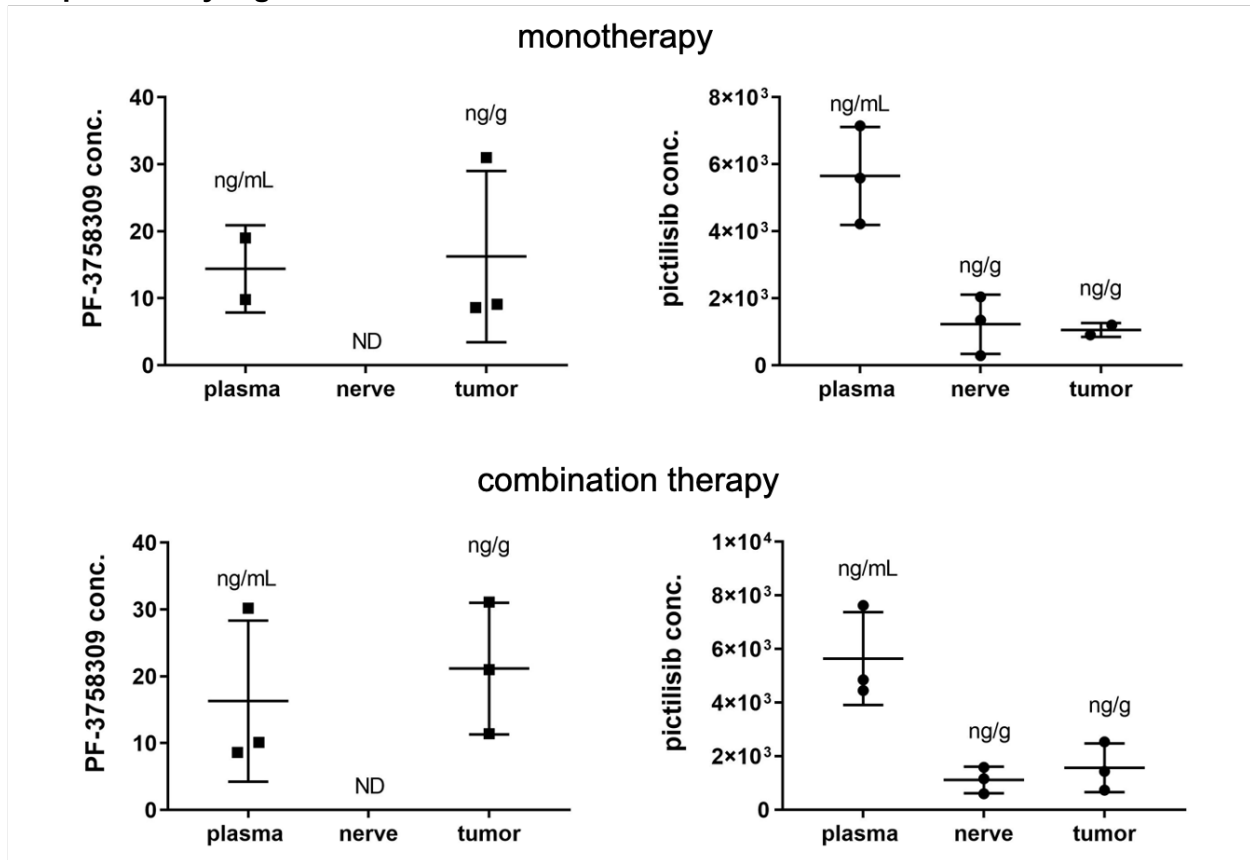

**Suupplementary Figure S3.** Pharmacokinetic analysis of pictilisib and PF-3758309 as monotherapies and in combination after two weeks of daily dosing. PF-3758309, although not detected in naïve nerve, was detected in tumor, revealing disruption of the blood-nerve barrier in nerves grafted with the merlin-deficient Schwann cells and the possibility of reduced clearance rate from the tumors for PF-3758309. PF-3758309 was detected at similar levels in plasma and tumor when delivered alone and with pictilisib. Pictilisib was observed in the plasma, normal nerve and tumors of all mice treated as single or combination therapy.

Supplementary Figure S4

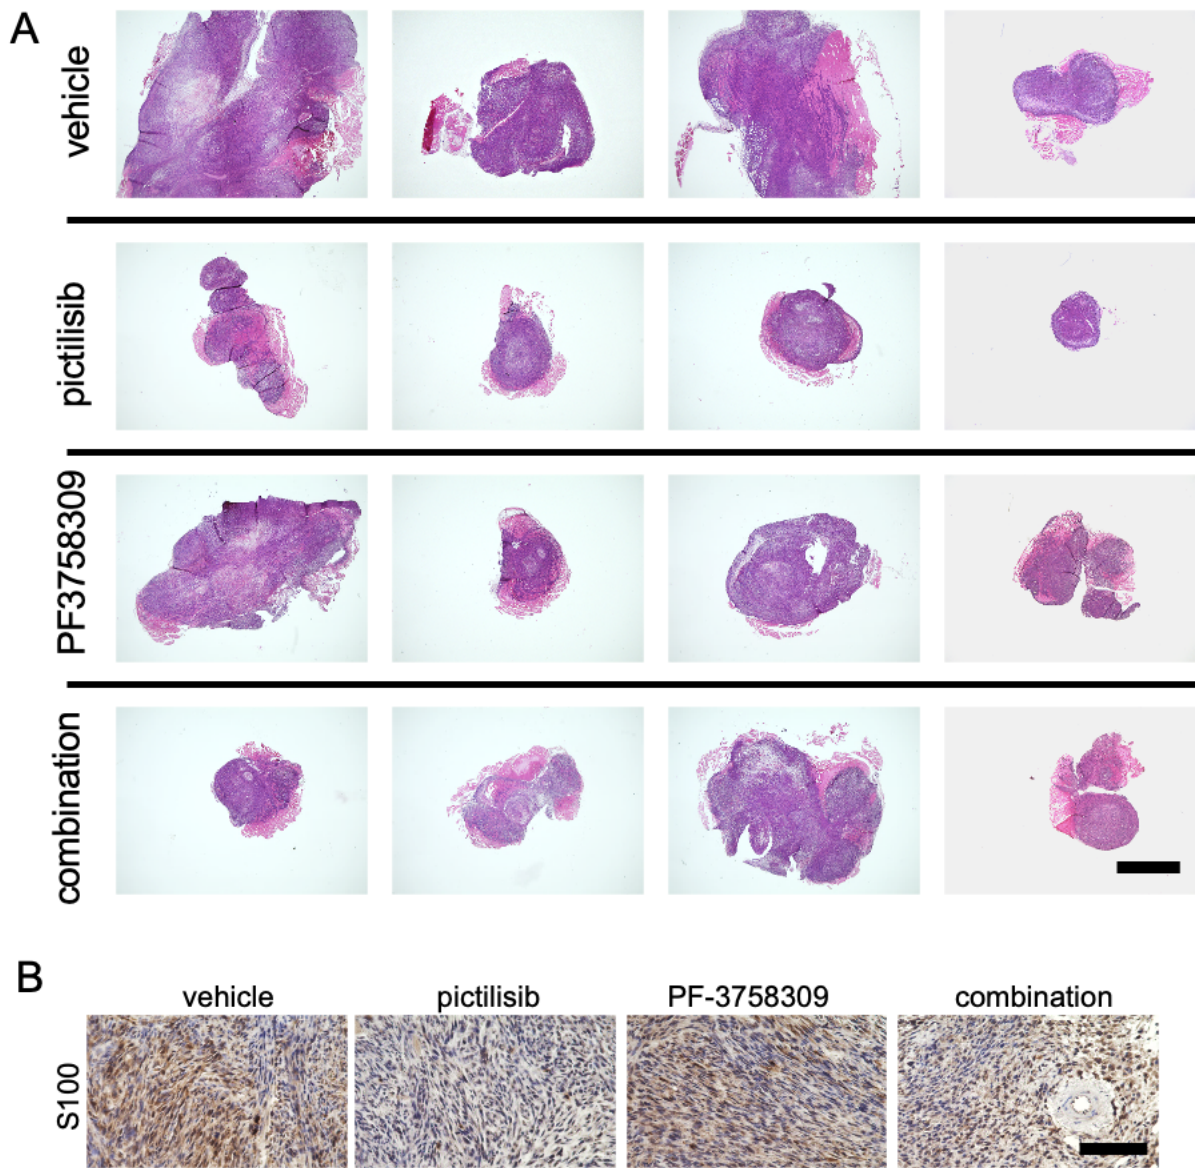

**Supplementary Figure S4.** Representative images of graft samples processed for histology (n=4/group) and (A) stained with hematoxylin and eosin imaged at 50x and (B) stained for S100 expression and imaged at 400x. Scale bar in A represents 1.5 mm. Scale bar in B represents 200  $\mu$ m.

## Supplementary Figure S5

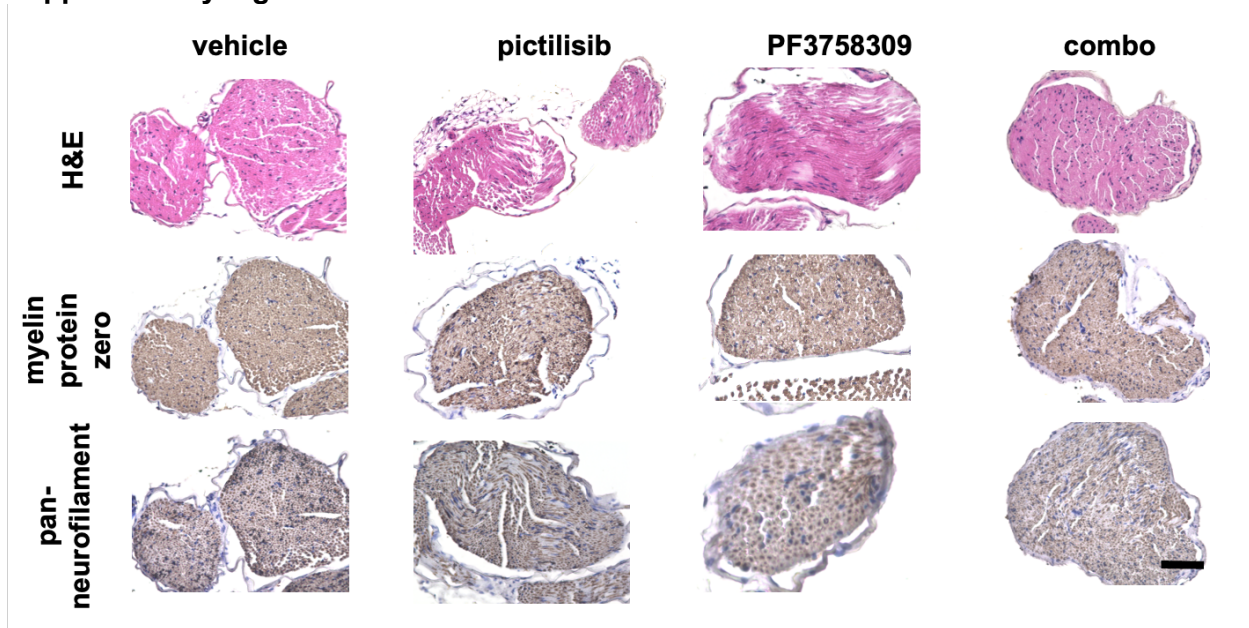

**Supplementary Figure S5.** Representative 100x images of contralateral control sciatic nerve samples processed for histology and stained with hematoxylin and eosin, myelin protein zero, and pan-neurofilament. There are no clear differences between groups in nerve morphology or Schwann cell-specific protein expression. Scale bar represents 400  $\mu\text{m}$ .

## Supplementary Figure S6

### Untreated cells

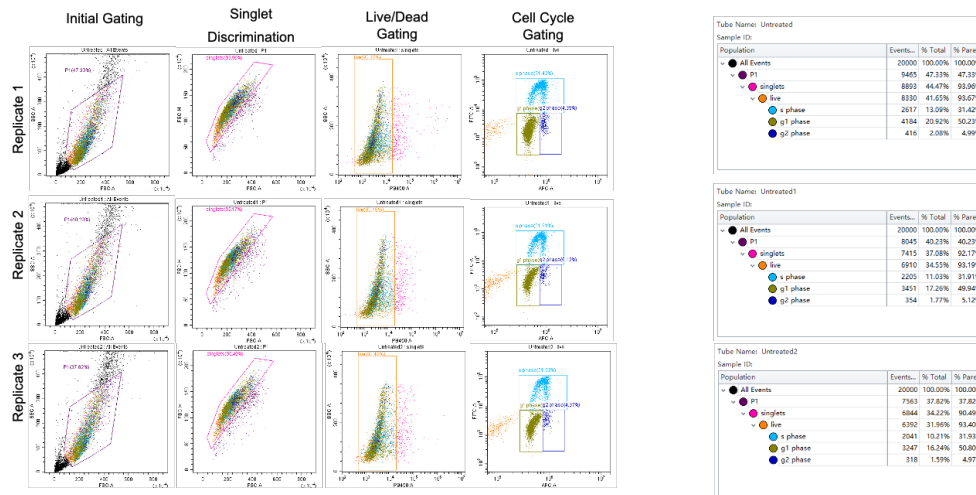

# DMSO treated cells

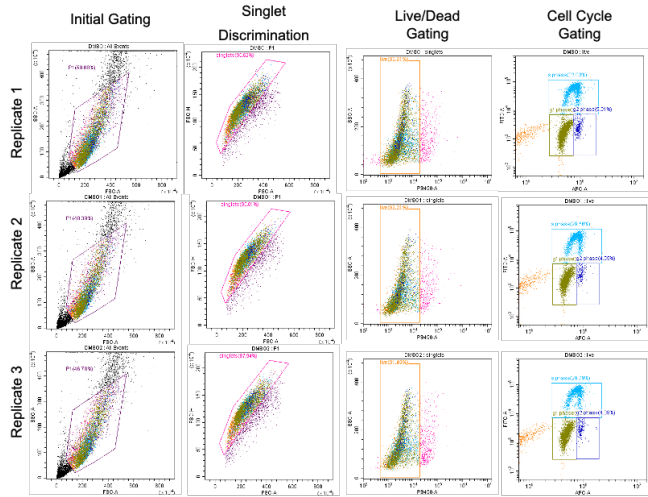

Tube Name: DMSO

Sample ID:

| Population | Events | % Total | % Para... |
|------------|--------|---------|-----------|
| All Events | 20000  | 100.00% | 100.00%   |
| P1         | 11816  | 59.08%  | 59.08%    |
| singlets   | 10708  | 53.54%  | 90.62%    |
| live       | 10024  | 50.12%  | 93.61%    |
| s phase    | 3211   | 16.06%  | 32.09%    |
| g1 phase   | 5214   | 26.07%  | 52.02%    |
| g2 phase   | 502    | 2.51%   | 5.01%     |

Tube Name: DMSO1

Sample ID:

| Population | Events | % Total | % Para... |
|------------|--------|---------|-----------|
| All Events | 20000  | 100.00% | 100.00%   |
| P1         | 9677   | 48.39%  | 48.39%    |
| singlets   | 8710   | 43.55%  | 90.01%    |
| live       | 8101   | 40.51%  | 93.01%    |
| s phase    | 2395   | 11.98%  | 29.56%    |
| g1 phase   | 4255   | 21.43%  | 53.02%    |
| g2 phase   | 369    | 1.85%   | 4.55%     |

Tube Name: DMSO2

Sample ID:

| Population | Events | % Total | % Para... |
|------------|--------|---------|-----------|
| All Events | 20000  | 100.00% | 100.00%   |
| P1         | 9355   | 46.78%  | 46.78%    |
| singlets   | 8227   | 41.14%  | 87.84%    |
| live       | 7527   | 37.64%  | 91.49%    |
| s phase    | 2242   | 11.21%  | 29.79%    |
| g1 phase   | 3979   | 19.90%  | 52.80%    |
| g2 phase   | 306    | 1.53%   | 4.89%     |

# PF-3758309 treated cells

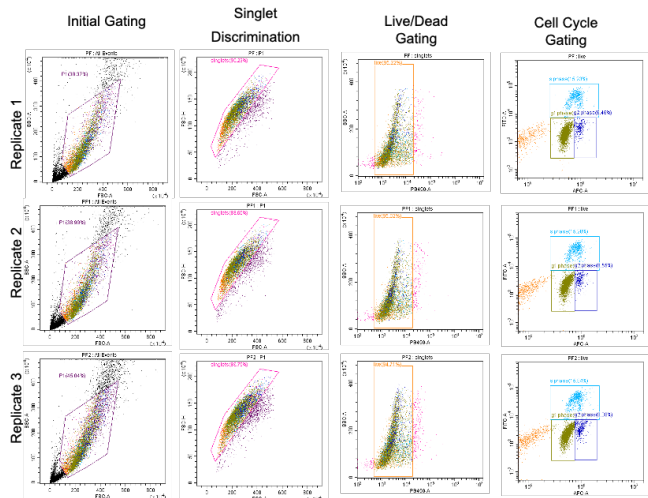

Tube Name: PF

Sample ID:

| Population | Events | % Total | % Para... |
|------------|--------|---------|-----------|
| All Events | 20000  | 100.00% | 100.00%   |
| P1         | 7613   | 38.07%  | 38.07%    |
| singlets   | 6923   | 34.62%  | 90.21%    |
| live       | 6592   | 32.96%  | 85.22%    |
| s phase    | 1004   | 5.02%   | 15.23%    |
| g1 phase   | 3871   | 19.36%  | 58.72%    |
| g2 phase   | 436    | 2.13%   | 6.46%     |

Tube Name: PF1

Sample ID:

| Population | Events | % Total | % Para... |
|------------|--------|---------|-----------|
| All Events | 20000  | 100.00% | 100.00%   |
| P1         | 7790   | 38.95%  | 38.95%    |
| singlets   | 6909   | 34.55%  | 88.60%    |
| live       | 6565   | 32.83%  | 95.02%    |
| s phase    | 958    | 4.79%   | 15.20%    |
| g1 phase   | 3644   | 18.22%  | 60.08%    |
| g2 phase   | 430    | 2.15%   | 6.55%     |

Tube Name: PF2

Sample ID:

| Population | Events | % Total | % Para... |
|------------|--------|---------|-----------|
| All Events | 20000  | 100.00% | 100.00%   |
| P1         | 9007   | 45.04%  | 45.04%    |
| singlets   | 7814   | 39.07%  | 86.75%    |
| live       | 7401   | 37.01%  | 94.71%    |
| s phase    | 1122   | 5.61%   | 15.86%    |
| g1 phase   | 4584   | 22.92%  | 62.07%    |
| g2 phase   | 620    | 3.10%   | 8.38%     |

# Pictilisib

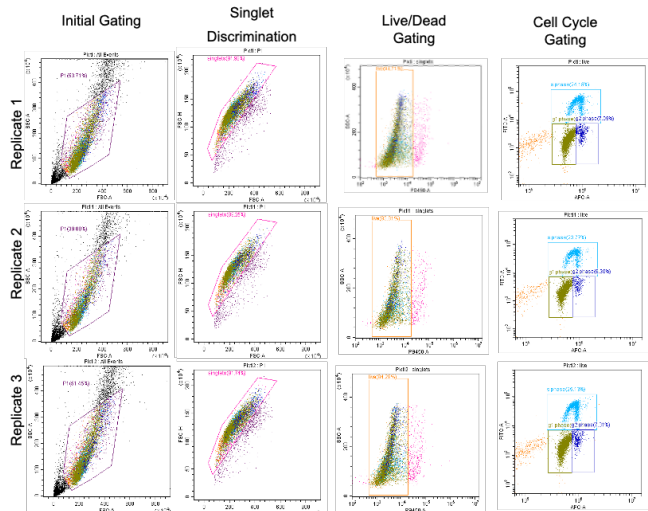

Tube Name: Pic1

Sample ID:

| Population | Events | % Total | % Para... |
|------------|--------|---------|-----------|
| All Events | 20000  | 100.00% | 100.00%   |
| P1         | 10741  | 53.71%  | 53.71%    |
| singlets   | 9880   | 49.40%  | 91.98%    |
| live       | 9227   | 46.14%  | 94.71%    |
| s phase    | 2260   | 11.30%  | 24.51%    |
| g1 phase   | 5828   | 29.14%  | 62.88%    |
| g2 phase   | 663    | 3.32%   | 7.09%     |

Tube Name: Pic11

Sample ID:

| Population | Events | % Total | % Para... |
|------------|--------|---------|-----------|
| All Events | 20000  | 100.00% | 100.00%   |
| P1         | 7815   | 39.08%  | 39.08%    |
| singlets   | 6975   | 34.88%  | 89.25%    |
| live       | 6543   | 32.72%  | 93.81%    |
| s phase    | 1555   | 7.78%   | 23.77%    |
| g1 phase   | 4284   | 21.42%  | 62.42%    |
| g2 phase   | 412    | 2.06%   | 6.30%     |

Tube Name: Pic12

Sample ID:

| Population | Events | % Total | % Para... |
|------------|--------|---------|-----------|
| All Events | 20000  | 100.00% | 100.00%   |
| P1         | 10290  | 51.45%  | 51.45%    |
| singlets   | 9440   | 47.20%  | 91.74%    |
| live       | 8931   | 44.66%  | 94.29%    |
| s phase    | 2227   | 11.14%  | 25.13%    |
| g1 phase   | 5420   | 27.10%  | 60.89%    |
| g2 phase   | 651    | 3.26%   | 7.31%     |

# Combination treated cells

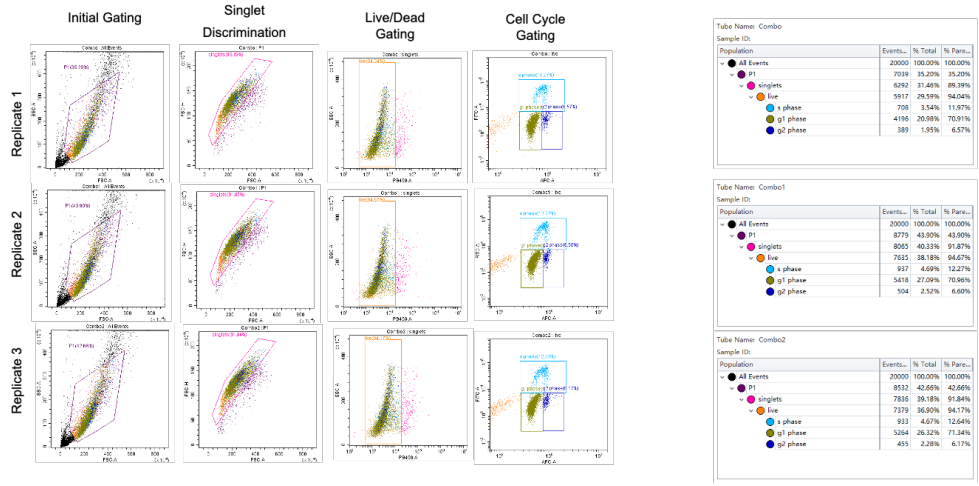

**Supplementary Figure S6.** Flow analysis of cell cycle in treated and untreated HS01 cells.

## Supplementary Figure S7

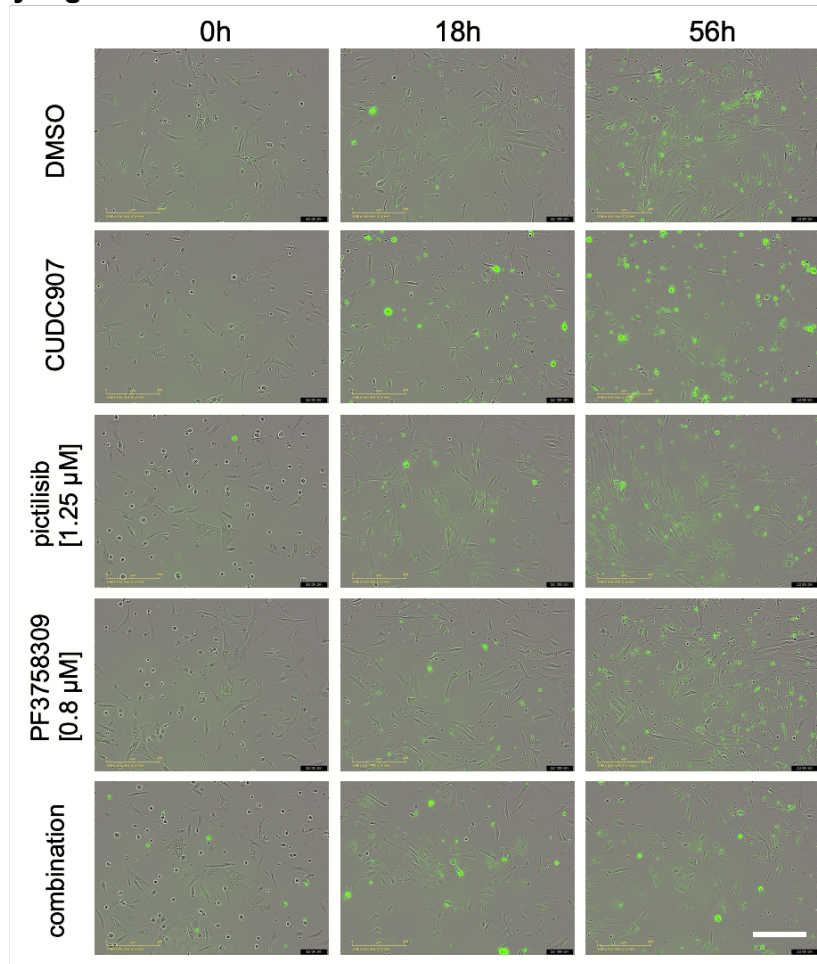

**Supplementary Figure S7.** Representative images of cleaved caspase3/7+ (green) cells imaged at 0h, 18h, and 54h of cultures with indicated treatments.

Supplementary Figure S8.

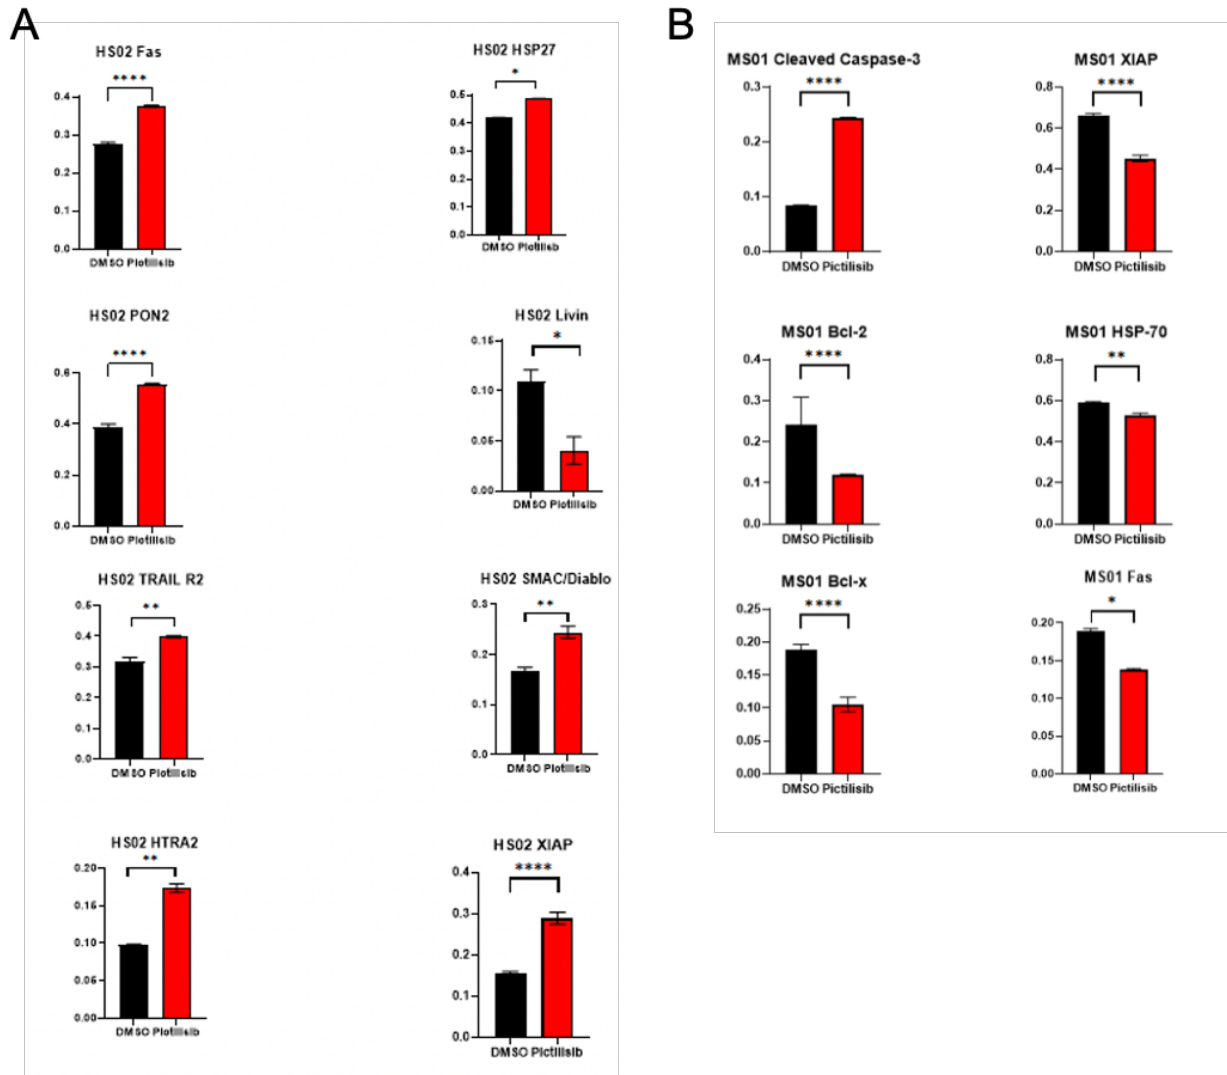

**Supplementary Figure S8.** All significant differences in protein levels detected by human (A) and mouse (B) Apoptosis Proteome Profiles arrays. \* $p < 0.05$ ; \*\* $p < 0.01$ , \*\*\*\* $p < 0.0001$  by Šídák's multiple comparisons test.
